# Supplementary material
Source: ML conference proceedings conference paper supplement (https://proceedings.neurips.cc/paper_files/paper/2020/hash/6b5617315c9ac918215fc7514bef514b-Abstract.html)
Supplement: Supplementary file [file 6b5617315c9ac918215fc7514bef514b-Supplemental.pdf]

## A Other related work

Kearns and Mansour [KM99] (see also [Kea96]) analyzed top-down impurity-based heuristics from the perspective of *boosting*, where the attributes queried in the tree are viewed as weak hypotheses.

Recent work of Blanc et al. [BLT20b] gives a top-down algorithm for learning decision trees that achieves provable guarantees for all target functions  $f$ . However, their algorithm makes crucial use of *membership queries*, which significantly limits its practical applicability and relevance. Furthermore, their guarantees only hold in the realizable setting, requiring that  $f$  is itself a size- $s$  decision tree (i.e.  $\text{opt}_s = 0$ ).

There has been extensive work in the learning theory literature on learning the concept class of decision trees [EH89, Blu92, KM93, OS07, GKK08, HKY18, CM19]. However, none of these algorithms proceed in a top-down manner like the practical heuristics that are the focus of this work; indeed, with the exception [EH89], these algorithms do not return a decision tree as their hypothesis. ([EH89]'s algorithm constructs its decision tree hypothesis in a *bottom-up* manner.)

## B Proof of Fact 2.1

Fact 2.1 is a simple consequence of the following lemma, whose proof also appears in [Jon16]:

**Lemma B.1.** *For all  $f : \{\pm 1\}^n \rightarrow \{\pm 1\}$  and  $i \in [n]$ ,*

$$\text{NS}_\delta(f) = \frac{1}{2} \text{NS}_\delta(f_{x_i=-1}) + \frac{1}{2} \text{NS}_\delta(f_{x_i=1}) + \frac{\delta}{2(1-\delta)} \cdot \text{Inf}_i^{(\delta)}(f).$$

*Proof.* Let  $\mathbf{x} \sim \{\pm 1\}^n$  be uniform random, and  $\tilde{\mathbf{x}} \sim_\delta \mathbf{x}$  be a  $\delta$ -noisy copy of  $\mathbf{x}$ . We first note that

$$\begin{aligned} \mathbb{E}[f(\mathbf{x})f(\tilde{\mathbf{x}})] &= \Pr[\mathbf{x}_i = \tilde{\mathbf{x}}_i] \cdot \mathbb{E}[f(\mathbf{x})f(\tilde{\mathbf{x}}) \mid \mathbf{x}_i = \tilde{\mathbf{x}}_i] + \Pr[\mathbf{x}_i \neq \tilde{\mathbf{x}}_i] \cdot \mathbb{E}[f(\mathbf{x})f(\tilde{\mathbf{x}}) \mid \mathbf{x}_i \neq \tilde{\mathbf{x}}_i] \\ &= \left(1 - \frac{\delta}{2}\right) \left(\frac{1}{2} \mathbb{E}[f(\mathbf{x}^{i=1})f(\tilde{\mathbf{x}}^{i=1})] + \frac{1}{2} \mathbb{E}[f(\mathbf{x}^{i=-1})f(\tilde{\mathbf{x}}^{i=-1})]\right) \\ &\quad + \frac{\delta}{2} \left(\frac{1}{2} \mathbb{E}[f(\mathbf{x}^{i=1})f(\tilde{\mathbf{x}}^{i=-1})] + \frac{1}{2} \mathbb{E}[f(\mathbf{x}^{i=-1})f(\tilde{\mathbf{x}}^{i=1})]\right). \end{aligned} \quad (7)$$

Next, we have that

$$\begin{aligned} \mathbb{E}[D_i f(\mathbf{x})D_i f(\tilde{\mathbf{x}})] &= \frac{1}{4} \mathbb{E}[(f(\mathbf{x}^{i=1}) - f(\mathbf{x}^{i=-1}))(f(\tilde{\mathbf{x}}^{i=1}) - f(\tilde{\mathbf{x}}^{i=-1}))] \\ &= \frac{1}{4} \mathbb{E}[f(\mathbf{x}^{i=1})f(\tilde{\mathbf{x}}^{i=1})] + \frac{1}{4} \mathbb{E}[f(\mathbf{x}^{i=-1})f(\tilde{\mathbf{x}}^{i=-1})] \\ &\quad - \frac{1}{4} \mathbb{E}[f(\mathbf{x}^{i=1})f(\tilde{\mathbf{x}}^{i=-1})] - \frac{1}{4} \mathbb{E}[f(\mathbf{x}^{i=-1})f(\tilde{\mathbf{x}}^{i=1})]. \end{aligned} \quad (8)$$

Combining Equations (7) and (8),

$$\begin{aligned} \mathbb{E}[f(\mathbf{x})f(\tilde{\mathbf{x}})] &= \frac{1}{2} \mathbb{E}[f(\mathbf{x}^{i=1})f(\tilde{\mathbf{x}}^{i=1})] + \frac{1}{2} \mathbb{E}[f(\mathbf{x}^{i=-1})f(\tilde{\mathbf{x}}^{i=-1})] - \delta \mathbb{E}[D_i f(\mathbf{x})D_i f(\tilde{\mathbf{x}})] \\ &= \frac{1}{2} \mathbb{E}[f_{x_i=1}(\mathbf{x})f_{x_i=1}(\tilde{\mathbf{x}})] + \frac{1}{2} \mathbb{E}[f_{x_i=-1}(\mathbf{x})f_{x_i=-1}(\tilde{\mathbf{x}})] - \frac{\delta}{1-\delta} \cdot \text{Inf}_i^{(\delta)}(f). \end{aligned}$$

Since  $\text{NS}_\delta(f) = \Pr[f(\mathbf{x}) \neq f(\tilde{\mathbf{x}})] = \frac{1}{2} - \frac{1}{2} \mathbb{E}[f(\mathbf{x})f(\tilde{\mathbf{x}})]$ , the lemma follows from the above by rearranging.  $\square$

*Proof of Fact 2.1.* We first note that

$$\begin{aligned} \text{NS}_\delta(f, T_{\ell^* \rightarrow x_i}^\circ) &= \sum_{\text{leaves } \ell \in T_{\ell^* \rightarrow x_i}^\circ} 2^{-|\ell|} \cdot \text{NS}_\delta(f_\ell) \\ &= \sum_{\text{leaves } \ell \in T^\circ} 2^{-|\ell|} \cdot \text{NS}_\delta(f_\ell) \\ &\quad + 2^{-(|\ell^*|+1)} \cdot \text{NS}_\delta(f_{\ell^*, x_i=-1}) + 2^{-(|\ell^*|+1)} \cdot \text{NS}_\delta(f_{\ell^*, x_i=1}) - 2^{-|\ell^*|} \cdot \text{NS}_\delta(f_{\ell^*}) \\ &= \text{NS}_\delta(f, T^\circ) + 2^{-|\ell^*|} \left(\frac{1}{2} \text{NS}_\delta(f_{\ell^*, x_i=-1}) + \frac{1}{2} \text{NS}_\delta(f_{\ell^*, x_i=1}) - \text{NS}_\delta(f_{\ell^*})\right). \end{aligned}$$

Applying Lemma B.1 with its ' $f$ ' being  $f_{\ell^*}$ , we have that

$$\frac{1}{2} \text{NS}_\delta(f_{\ell^*, x_i=-1}) + \frac{1}{2} \text{NS}_\delta(f_{\ell^*, x_i=1}) - \text{NS}_\delta(f_{\ell^*}) = -\frac{\delta}{2(1-\delta)} \cdot \text{Inf}_i^{(\delta)}(f_{\ell^*}),$$

and this completes the proof.  $\square$

### C Proof of Theorem 3

*Proof.* We apply Theorem 2 with ‘ $T$ ’ being  $T^*$ , ‘ $g$ ’ being  $f_{\delta}^{\leq d}$ , and  $\rho$  being the semimetric  $\rho(a, b) = (a - b)^2/2$ . As shown by [OSSS05] (and as can be easily verified),  $\text{Def}_k(\rho) \leq k$  for this choice of  $\rho$ , and so

$$\text{Cov}_{\rho}(T^*, f_{\delta}^{\leq d}) \leq k \sum_{i=1}^n \lambda_i(T^*) \cdot \frac{1}{2} \mathbb{E} [(f_{\delta}^{\leq d}(\mathbf{x}) - f_{\delta}^{\leq d}(\mathbf{x}^{\sim i}))^2]. \quad (9)$$

We first analyze the quantity on the LHS of Equation (9). For  $\mathbf{x}, \mathbf{x}' \sim \{\pm 1\}^n$  uniform and independent,

$$\begin{aligned} \text{Cov}_{\rho}(T^*, f_{\delta}^{\leq d}) &= \frac{1}{2} (\mathbb{E} [(T^*(\mathbf{x}) - f_{\delta}^{\leq d}(\mathbf{x}'))^2] - \mathbb{E} [(T^*(\mathbf{x}) - f_{\delta}^{\leq d}(\mathbf{x}))^2]) \\ &\geq \frac{1}{4} \mathbb{E} [(f_{\delta}^{\leq d}(\mathbf{x}) - f_{\delta}^{\leq d}(\mathbf{x}'))^2] - \mathbb{E} [(T^*(\mathbf{x}) - f_{\delta}^{\leq d}(\mathbf{x}))^2] \\ &= \frac{1}{2} \text{Var}(f_{\delta}^{\leq d}) - \mathbb{E} [(T^*(\mathbf{x}) - f_{\delta}^{\leq d}(\mathbf{x}))^2], \end{aligned} \quad (10)$$

where the inequality uses the ‘‘almost-triangle’’ inequality  $(a - c)^2 \leq 2((a - b)^2 + (b - c)^2)$  for  $a, b, c \in \mathbb{R}$ . Furthermore, we have

$$\begin{aligned} \text{Var}(f_{\delta}) &= \sum_{S \neq \emptyset} (1 - \delta)^{2|S|} \widehat{f}(S)^2 && \text{(Fourier formulas for } f_{\delta} \text{ (5) and variance (4))} \\ &= \sum_{\substack{S \neq \emptyset \\ |S| \leq d}} (1 - \delta)^{2|S|} \widehat{f}(S)^2 + \sum_{|S| > d} (1 - \delta)^{2|S|} \widehat{f}(S)^2 \\ &\leq \text{Var}(f_{\delta}^{\leq d}) + \sum_{|S| > d} e^{(-\delta)2|S|} \widehat{f}(S)^2 && (1 + a \leq e^a) \\ &\leq \text{Var}(f_{\delta}^{\leq d}) + e^{-2d\delta} \sum_{|S| > d} \widehat{f}(S)^2 && \text{(Since } |S| > d) \\ &\leq \text{Var}(f_{\delta}^{\leq d}) + e^{-2d\delta} && \text{(Parseval's identity (3): } \sum_{S \subseteq [n]} \widehat{f}(S)^2 = 1) \\ &\leq \text{Var}(f_{\delta}^{\leq d}) + \varepsilon. && \text{(Since } d = \log(1/\varepsilon)/\delta) \end{aligned}$$

Similarly,

$$\begin{aligned} \mathbb{E} [(T^*(\mathbf{x}) - f_{\delta}^{\leq d}(\mathbf{x}))^2] &\leq 2 (\mathbb{E} [(T^*(\mathbf{x}) - f_{\delta}(\mathbf{x}))^2] + \mathbb{E} [(f_{\delta}(\mathbf{x}) - f_{\delta}^{\leq d}(\mathbf{x}))^2]) \\ &&& \text{('‘almost-triangle’’ inequality)} \\ &= 2 \left( \mathbb{E} [(T^*(\mathbf{x}) - f_{\delta}(\mathbf{x}))^2] + \sum_{|S| > d} (1 - \delta)^{|S|} \widehat{f}(S)^2 \right) \\ &\leq 2 (\mathbb{E} [(T^*(\mathbf{x}) - f_{\delta}(\mathbf{x}))^2] + \varepsilon). && \text{(Since } d = \log(1/\varepsilon)/\delta) \end{aligned}$$

Combining these bounds with Equation (10), we have the following lower bound on the LHS of Equation (9):

$$\begin{aligned} \text{Cov}(T^*, f_{\delta}^{\leq d}) &\geq \frac{1}{2} (\text{Var}(f_{\delta}) - \varepsilon) - (2 \mathbb{E} [(T^*(\mathbf{x}) - f_{\delta}(\mathbf{x}))^2] + 2\varepsilon). \\ &= \frac{1}{2} \text{Var}(f_{\delta}) - (2 \mathbb{E} [(T^*(\mathbf{x}) - f_{\delta}(\mathbf{x}))^2] + \frac{5}{2}\varepsilon). \end{aligned} \quad (11)$$

We now turn to analyzing the RHS of Equation (9):

$$\begin{aligned}
& k \sum_{i=1}^n \lambda_i(T^*) \cdot \frac{1}{2} \mathbb{E} [(f_{\delta}^{\leq d}(\mathbf{x}) - f_{\delta}^{\leq d}(\mathbf{x}^{\sim i}))^2] \\
&= k \sum_{i=1}^n \lambda_i(T^*) \cdot \frac{1}{4} \mathbb{E} [(f_{\delta}^{\leq d}(\mathbf{x}) - f_{\delta}^{\leq d}(\mathbf{x}^{\oplus i}))^2] \quad (\mathbf{x}^{\oplus i} = \mathbf{x} \text{ with its } i\text{-th coordinate flipped}) \\
&= k \sum_{i=1}^n \lambda_i(T^*) \cdot \mathbb{E} [D_i f_{\delta}^{\leq d}(\mathbf{x})^2] \\
&= k \sum_{i=1}^n \lambda_i(T^*) \cdot \text{Inf}_i(f_{\delta}^{\leq d}) \quad (\text{Definition 2}) \\
&= k \cdot \max_{i \in [n]} \left\{ \text{Inf}_i(f_{\delta}^{\leq d}) \right\} \cdot \sum_{i=1}^n \lambda_i(T^*) \leq k \cdot \max_{i \in [n]} \left\{ \text{Inf}_i(f_{\delta}^{\leq d}) \right\} \cdot \log s, \quad (12)
\end{aligned}$$

where the final inequality holds because

$$\sum_{i=1}^n \lambda_i(T^*) = \sum_{i=1}^n \Pr[T^* \text{ queries } \mathbf{x}_i] = \sum_{\text{leaves } \ell \in T^*} 2^{-|\ell|} \cdot |\ell| \leq \log s.$$

Finally, we note that:

$$\begin{aligned}
\text{Inf}_i(f_{\delta}^{\leq d}) &= \sum_{\substack{S \ni i \\ |S| \leq d}} (1 - \delta)^{2|S|} \widehat{f}(S)^2 \quad (\text{Fourier formula for influence; Definition 2}) \\
&\leq \sum_{\substack{S \ni i \\ |S| \leq d}} (1 - \delta)^{|S|} \widehat{f}(S)^2 = \text{Inf}_i^{(\delta, d)}(f).
\end{aligned}$$

Combining this with Equations (9), (11) and (12) and rearranging completes the proof.  $\square$

## D Proofs of Facts 4.1 and 4.2 and Propositions E.1 and E.2

*Proof of Fact 4.1.* This follows by combining the bounds  $\text{Inf}(T) \leq \log s$  (see e.g. [OS07]) and  $\text{NS}_{\delta}(f) \leq \delta \cdot \text{Inf}(f)$  for all  $f : \{\pm 1\}^n \rightarrow \{\pm 1\}$  [O'D14, Exercise 2.42].  $\square$

*Proof of Fact 4.2.* Let  $\mathbf{x} \sim \{\pm 1\}^n$  be uniform random and  $\tilde{\mathbf{x}} \sim_{\delta} \mathbf{x}$  be a  $\delta$ -noisy copy of  $\mathbf{x}$ . Then

$$\begin{aligned}
\text{NS}_{\delta}(f) &= \Pr[f(\mathbf{x}) \neq f(\tilde{\mathbf{x}})] \\
&\leq \Pr[T(\mathbf{x}) \neq T(\tilde{\mathbf{x}})] + \Pr[T(\mathbf{x}) \neq f(\mathbf{x})] + \Pr[T(\tilde{\mathbf{x}}) \neq f(\tilde{\mathbf{x}})] \\
&\leq \text{NS}_{\delta}(T) + 2 \Pr[T(\mathbf{x}) \neq f(\mathbf{x})],
\end{aligned}$$

where the final inequality uses that fact that  $\mathbf{x}$  and  $\tilde{\mathbf{x}}$  are distributed identically.  $\square$

## E The case analysis in the proof of Theorem 4

**Case 1:**  $\mathbb{E}_{\ell}[\text{Var}((f_{\ell})_{\delta})] \geq 4 \mathbb{E}_{\ell}[\|(f_{\ell})_{\delta} - T_{\text{opt}}^{\text{trunc}}\|_2^2] + 7\varepsilon.$

In this case we claim that there is a leaf  $\ell^*$  of  $T^{\circ}$  with a high score, where we recall that the score of a leaf  $\ell$  is defined to be

$$\text{score}(\ell) := 2^{-|\ell|} \cdot \max_{i \in [n]} \left\{ \text{Inf}_i^{(\delta, d)}(f_{\ell}) \right\}.$$

Applying Theorem 3 with its ‘ $T^*$ ’ being  $T_{\text{opt}}^{\text{trunc}}$  and its ‘ $f$ ’ being  $f_\ell$  for each leaf  $\ell \in T^\circ$ , we have that

$$\begin{aligned} \mathbb{E} \left[ \max_{i \in [n]} \{ \text{Inf}_i^{(\delta, d)}(f_\ell) \} \right] &\geq \frac{\frac{1}{2} \mathbb{E}[\text{Var}(f_\ell)_\delta] - \left( 2 \mathbb{E} \left[ \|T_{\text{opt}}^{\text{trunc}} - (f_\ell)_\delta\|_2^2 \right] + \frac{5}{2} \varepsilon \right)}{\log(s/\varepsilon) \log s} \quad (\text{Theorem 3}) \\ &\geq \frac{\varepsilon}{\log(s/\varepsilon) \log s}, \end{aligned} \quad (13)$$

where the second inequality is by the assumption that we are in Case 1. Equivalently,

$$\sum_{\ell \in T^\circ} 2^{-|\ell|} \cdot \max_{i \in [n]} \{ \text{Inf}_i^{\delta, d}(f_\ell) \} \geq \frac{\varepsilon}{\log(s/\varepsilon) \log s},$$

and so there must exist a leaf  $\ell^* \in T^\circ$  such that

$$\text{score}(\ell^*) = 2^{-|\ell^*|} \cdot \max_{i \in [n]} \{ \text{Inf}_i^{(\delta, d)}(f_{\ell^*}) \} \geq \frac{\varepsilon}{|T^\circ| \log(s/\varepsilon) \log s},$$

where  $|T^\circ|$  denotes the size of  $T^\circ$ .

**Case 2:**  $\mathbb{E}[\text{Var}((f_\ell)_\delta)] < 4 \mathbb{E}[\|(f_\ell)_\delta - T_{\text{opt}}^{\text{trunc}}\|_2^2] + 7\varepsilon$ .

In this case, we claim that  $\text{error}_f(T_f^\circ) \leq O(\text{opt}_s + \kappa + \varepsilon)$ . We will need a couple of propositions:

**Proposition E.1.**  $\mathbb{E}[\|(f_\ell)_\delta - f_\ell\|_2^2] \leq 4\kappa$ .

*Proof.* We first note that

$$\begin{aligned} \mathbb{E}_\ell [\|(f_\ell)_\delta - f_\ell\|_2^2] &\leq 2 \mathbb{E}_\ell [\|(f_\ell)_\delta - f_\ell\|_1] \quad (\text{Since } f_\ell \text{ and } (f_\ell)_\delta \text{ are } [-1, 1]\text{-valued}) \\ &= 2 \mathbb{E}_\ell \left[ \mathbb{E}_{\mathbf{x}} [|(f_\ell)_\delta(\mathbf{x}) - f_\ell(\mathbf{x})|] \right] \\ &= 2 \mathbb{E}_\ell \left[ \mathbb{E}_{\substack{\mathbf{x} \\ \tilde{\mathbf{x}} \sim_\delta \mathbf{x}}} [|(f_\ell)(\tilde{\mathbf{x}}) - f_\ell(\mathbf{x})|] \right] \\ &= 2 \mathbb{E}_\ell \left[ 2 \Pr_{\substack{\mathbf{x} \\ \tilde{\mathbf{x}} \sim_\delta \mathbf{x}}} [f_\ell(\tilde{\mathbf{x}}) \neq f_\ell(\mathbf{x})] \right] \\ &= 4 \mathbb{E}_\ell [\text{NS}_\delta(f_\ell)] = 4 \text{NS}_\delta(f, T^\circ). \end{aligned}$$

By Fact 2.1, we have that  $\text{NS}_\delta(f, T^\circ) \leq \text{NS}_\delta(f)$ , and the claim follows.  $\square$

**Proposition E.2.** For each leaf  $\ell \in T^\circ$ , we have  $\mathbb{E}[(f_\ell(\mathbf{x}) - \text{sign}(\mathbb{E}[f_\ell]))^2] \leq 2 \mathbb{E}[(f_\ell(\mathbf{x}) - c)^2]$  for all constants  $c \in \mathbb{R}$ .

*Proof.* Let  $p := \Pr[f_\ell(\mathbf{x}) = 1]$  and assume without loss of generality that  $p \geq \frac{1}{2}$ . On one hand, we have that  $\mathbb{E}[(f_\ell(\mathbf{x}) - \text{sign}(\mathbb{E}[f_\ell]))^2] = \mathbb{E}[(f_\ell(\mathbf{x}) - 1)^2] = 4(1 - p)$ . On the other hand, since

$$\mathbb{E}[(f_\ell(\mathbf{x}) - c)^2] = p(1 - c)^2 + (1 - p)(1 + c)^2$$

this quantity is minimized for  $c = 2p - 1$  and attains value  $4p(1 - p)$  at this minimum. Therefore indeed

$$\min_c \{ \mathbb{E}[(f_\ell(\mathbf{x}) - c)^2] \} = 4p(1 - p) \geq 2(1 - p) = \frac{1}{2} \mathbb{E}[(f_\ell(\mathbf{x}) - \text{sign}(\mathbb{E}[f_\ell]))^2]$$

and the proposition follows.  $\square$

With Propositions E.1 and E.2 in hand, we are ready to bound  $\text{error}_f(T_f^\circ)$ . Recall that  $T_f^\circ$  is the completion of  $T^\circ$  that we obtain by labeling each leaf  $\ell$  with  $\text{sign}(\mathbb{E}[f_\ell])$ . Therefore,

$$\begin{aligned}
\text{error}_f(T_f^\circ) &= \mathbb{E}_\ell [\text{dist}(f_\ell, \text{sign}(\mathbb{E}[f_\ell]))] \\
&= \frac{1}{4} \mathbb{E}_\ell [\|f_\ell - \text{sign}(\mathbb{E}[f_\ell])\|_2^2] \\
&\leq \frac{1}{2} \mathbb{E}_\ell [\|f_\ell - \mathbb{E}[(f_\ell)_\delta]\|_2^2] && \text{(Proposition E.2)} \\
&\leq \mathbb{E}_\ell [\|f_\ell - (f_\ell)_\delta\|_2^2] + \mathbb{E}_\ell [\|(f_\ell)_\delta - \mathbb{E}[(f_\ell)_\delta]\|_2^2] \\
&\leq 4\kappa + \mathbb{E}_\ell [\text{Var}((f_\ell)_\delta)] && \text{(Proposition E.1)}
\end{aligned}$$

By the assumption that we are in Case 2, we have that:

$$\begin{aligned}
\mathbb{E}_\ell [\text{Var}((f_\ell)_\delta)] &< 4 \mathbb{E}_\ell [\|(f_\ell)_\delta - T_{\text{opt}}^{\text{trunc}}\|_2^2] + 7\varepsilon \\
&\leq 8 \left( 4\kappa + \mathbb{E}_\ell [\|f_\ell - T_{\text{opt}}^{\text{trunc}}\|_2^2] \right) + 7\varepsilon && \text{(Proposition E.1)} \\
&= 8 \left( 4\kappa + 4 \mathbb{E}_\ell [\text{dist}(f_\ell, T_{\text{opt}}^{\text{trunc}})] \right) + 7\varepsilon \\
&= 8(4\kappa + 4(\text{opt}_s + \varepsilon)) + 7\varepsilon \\
&\leq O(\text{opt}_s + \kappa + \varepsilon).
\end{aligned}$$

and so we have shown that  $\text{error}_f(T_f^\circ) \leq O(\text{opt}_s + \kappa + \varepsilon)$ .
